# Supplementary material
Source: PubMed Central journal article supplement (PMC5833978)
Supplement: NIHMS905914-supplement-2.pdf [file NIHMS905914-supplement-2.pdf]

Supplemental Figures S1 – S7, and Supplemental Table S1  
 Rebecca et al.

**Supplemental Figure S1**

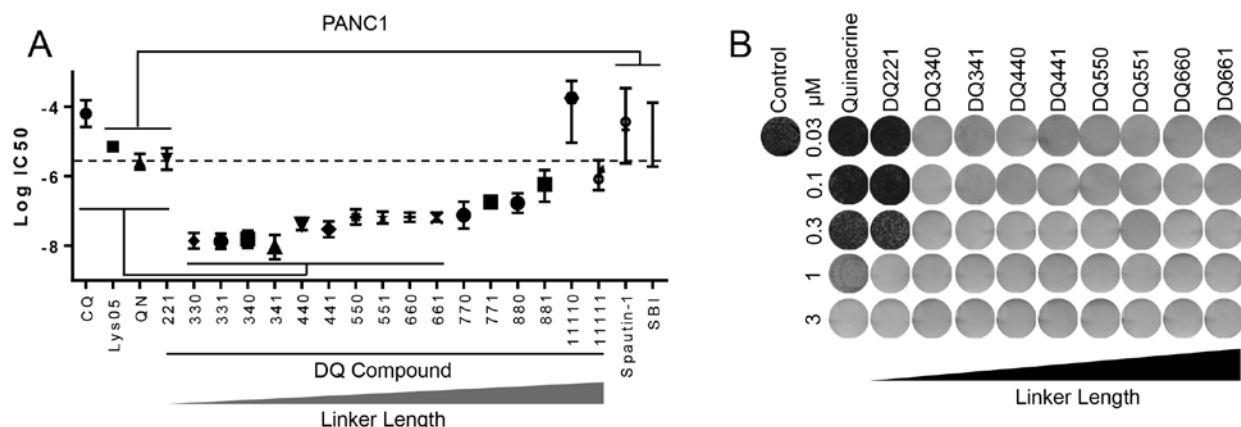

**Supplemental Figure S1 related to Figure 1:**

**(A)** PANC1 (pancreatic cancer) cells were treated with compounds shown (72 hr, 1 nM – 30 µM). Displayed are calculated Log IC<sub>50</sub> values generated from GraphPad Prism. **(B)** PANC1 cells were treated with compounds shown (2 weeks, 30 nM - 3 µM) in colony formation assays. Cells were subsequently stained with crystal violet and imaged.

**Supplemental Figure S2**

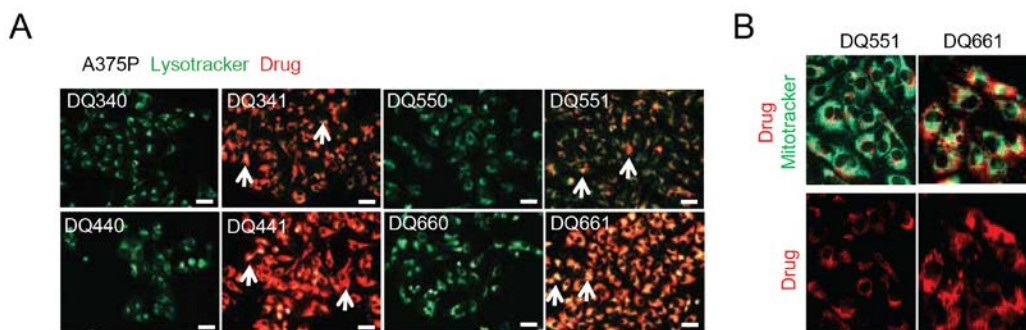

**Supplemental Figure S2 related to Figure 2:**

**(A)** A375P cells were treated with DQs shown (6 hr, 3 µM) and co-stained with LysoTracker far-red. Fluorescent microscopy images were acquired and arrows indicate co-localization of DQ (RFP channel) and LysoTracker. Scale bars are 50 µm. **(B)** A375P cells were treated as in **(A)** and co-stained with MitoTracker far-red. **(C)** PANC1 cells were treated with compounds shown (6 hr, 3 µM). Lysates were immunoblotted and change in p62 densitometry levels were quantified and are depicted in the graph to the right; \*p<0.05

# Supplemental Figure S3

**A**

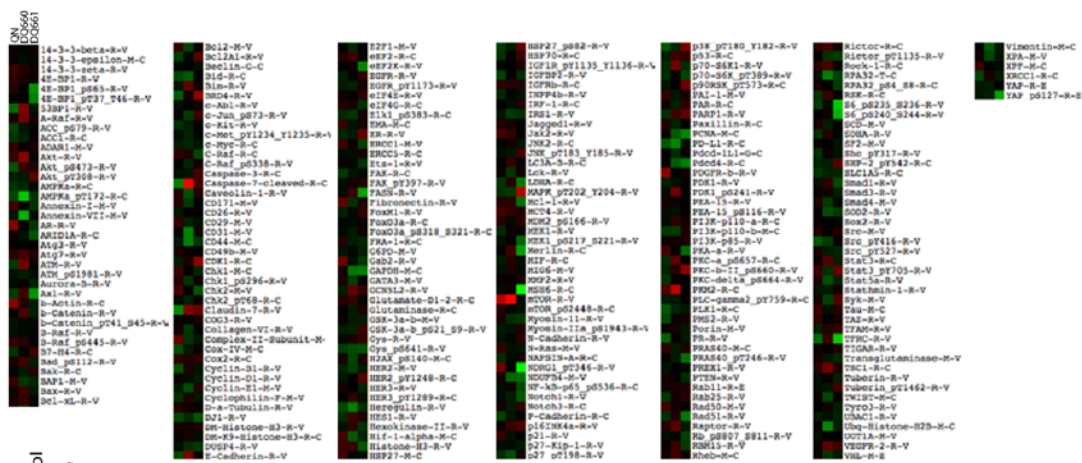

**B**

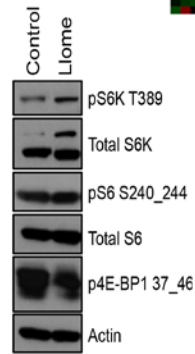

**C**

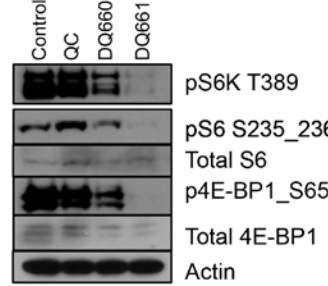

**D**

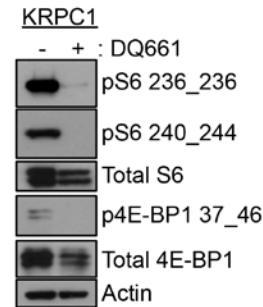

**E**

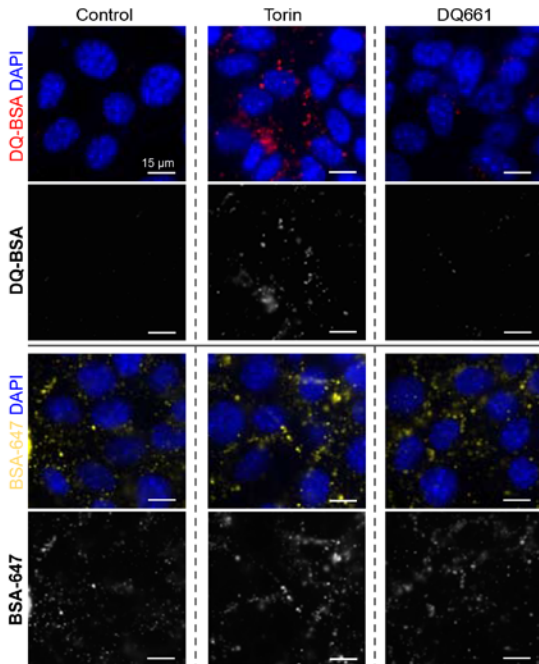

**F**

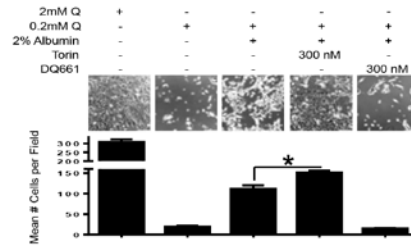

**G**

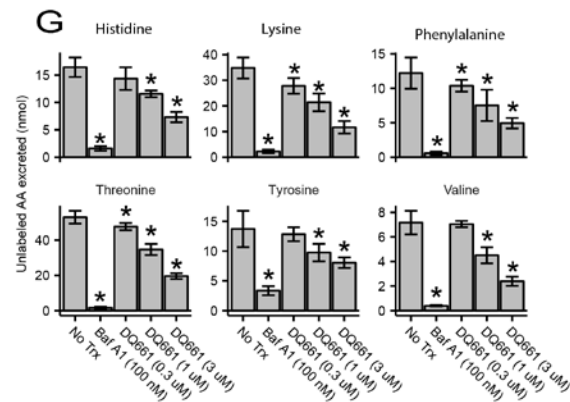

## Supplemental Figure S3 related to Figure 3:

(A) A375P cells were treated with QC, DQ660, or DQ661 (6 hr, 3  $\mu$ M) and lysate was analyzed by RPPA. Shown are calculated fold-changes for the 6 hr and 24 hr timepoints relative to vehicle-treated control. Results reflect the average of 3 biological replicates.

**(B)** A375P cells were treated with Llome (30 min, 2 mM) and lysate was immunoblotted. **(C)** Western blotting validation of RPPA results, demonstrating only DQ661 possesses anti-mTORC1 activity. **(D)** KRPC cells treated with DQ661 (6 hr, 3  $\mu$ M) and lysate was immunoblotted. **(E)** Fluorescence microscopy of G43 (immunotherapy-resistant *KPC*) cells grown in glutamine-limiting conditions and treated for 6 hr with vehicle control, Torin-1 (100 nM), or DQ661 (3  $\mu$ M) in the presence of DQ-BSA (red) or BSA-647 (yellow) (1  $\mu$ g/mL). **(F)** G43 cells were grown in glutamine limiting conditions in the presence or absence of Torin 1 or DQ661 (72 hr, 300 nM). **(G)** Effect of bafilomycin (100nM) or DQ661 (0.3, 1, 3  $\mu$ M) on excretion of serum protein-derived amino acids in KRPC-A cells. \*  $p < 0.05$  by t-test for (D), (F) and (G).

## Supplemental Figure S4

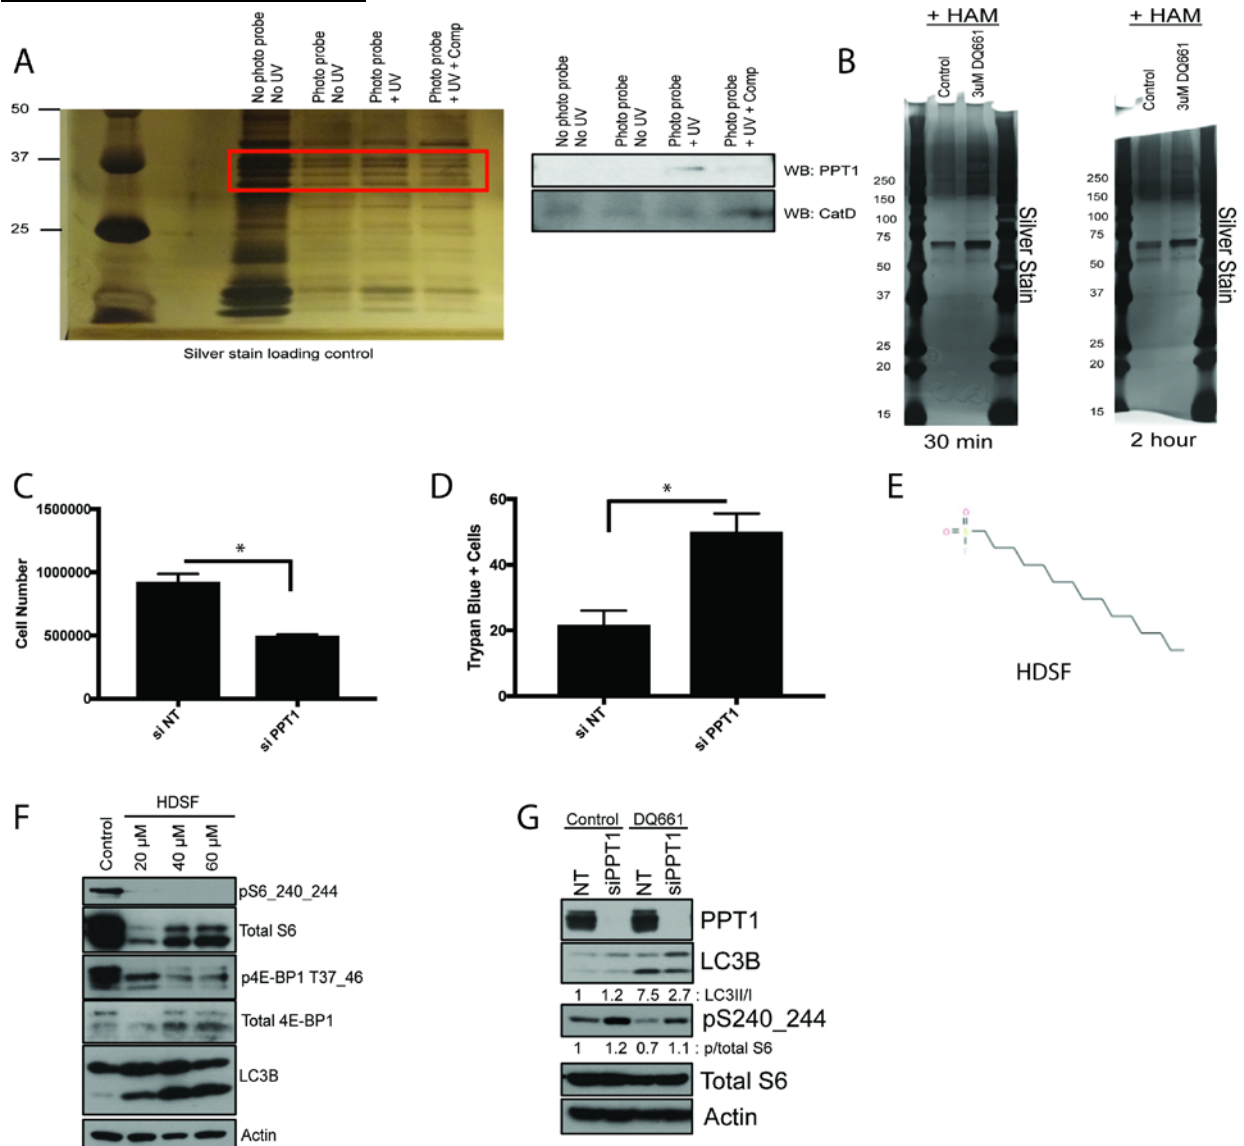

### Supplemental Figure S4 related to Figure 4:

**(A)** Silver stained gel (for loading control) and immunoblot demonstrating pull-down of PPT1 with DQ661-photoprobe. **(B)** A375P cells were treated as shown and an ABE assay was performed. Lysate was run on and silver stained to reveal changes in global palmitoylation. **(C)** A375P cells were treated with siPPT1 and cells were counted after 24 hrs transfection. **(D)** A375P cells were treated identical to (C) and trypan blue exclusion was quantified. Results reflect at least 2 independent experiments. **(E)** Chemical structure of HDSF. **(F)** A375P cells were treated as shown for 4 hours. Lysates were immunoblotted. **(G)** A375P cells were transfected with NT or siPPT1 for 48 hr prior to treatment with DQ661 (6 hr, 3  $\mu$ M). Lysate was subsequently immunoblotted.

## Supplemental Figure S5

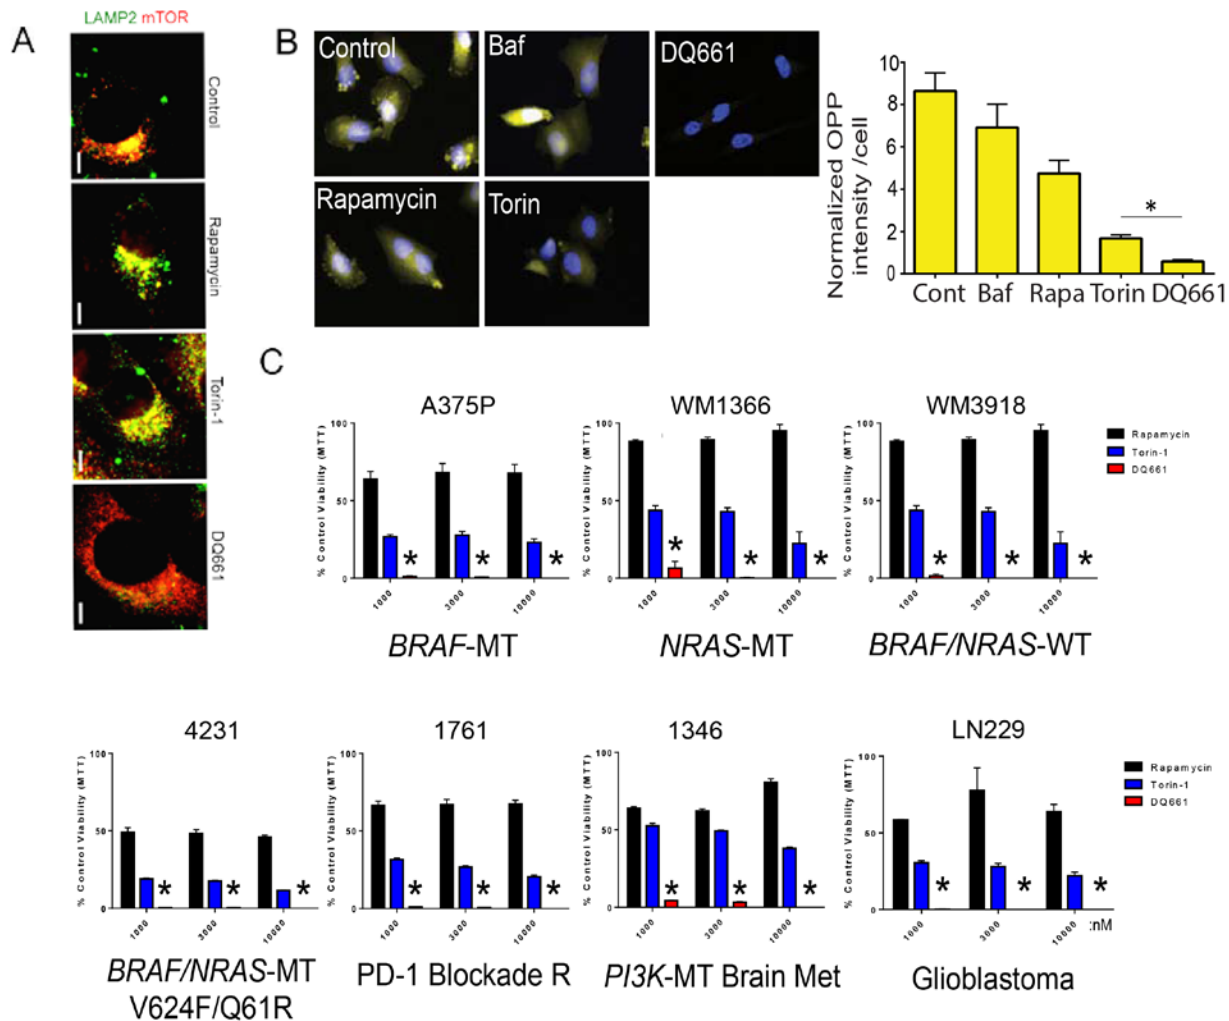

### Supplemental Figure S5 related to Figure 5:

**(A)** Immunofluorescence against mTOR (red) and LAMP2 (green) in A375P cells treated with vehicle control, rapamycin (6hr, 3  $\mu$ M), torin-1 (6 hr, 3  $\mu$ M) or DQ661 (6 hr, 3  $\mu$ M). Scale bars represent 8.5  $\mu$ m. **(B)** 1205Lu (melanoma) cells were treated with rapamycin (3  $\mu$ M), torin-1 (3  $\mu$ M), baf (100 nM), or DQ661 (3  $\mu$ M) for 3 hr. Blue is DAPI and yellow fluorescence reflects de novo synthesized protein. Graph to the right represented as mean  $\pm$  STDERR.  $N = 30$  cells per condition. \* $p < 0.001$ . Scale bars: 30  $\mu$ m. **(C)** Cells treated with rapamycin, torin-1, or DQ661 (1 - 10 $\mu$ M, 72 hrs, MTT). **(E)** A375P cells were treated with quinacrine, DQ661 or Siramesine (1 - 10 $\mu$ M, 72 hrs, MTT). Scale bars: 30  $\mu$ m in (H).

## Supplemental Figure S6

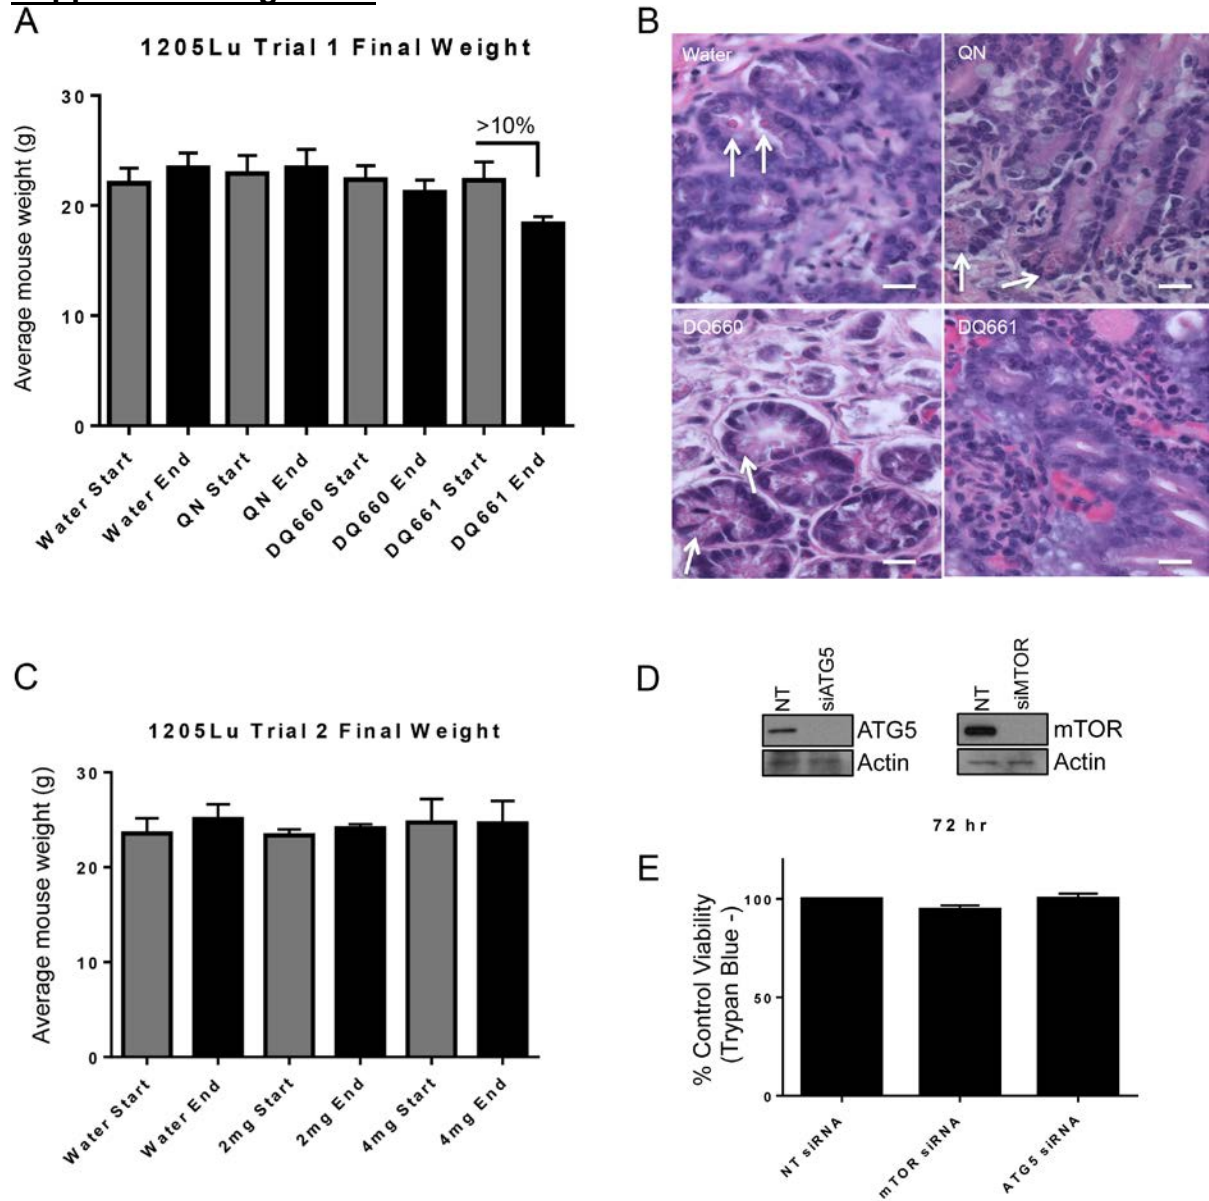

### Supplemental Figure S6 related to Figure 6:

**(A)** Average mouse weights at the start and end of treatment with vehicle control (water), QN (8 mg/kg), DQ660 (8 mg/kg) or DQ661 (8 mg/kg). **(B)** Microscopy of H&E of gastrointestinal sections isolated from mice treated with either vehicle control (Water), QN (8 mg/kg), DQ660 (8 mg/kg) or DQ661 (8 mg/kg). Arrows denote presence of paneth cells. Magnification 40X. **(C)** Average mouse weights at the start and end of treatment with vehicle control (water), DQ661 (2 mg/kg) or DQ661 (4 mg/kg). **(D)** 1205Lu cells were transfected with NT, siMTOR or siATG5 prior to immunoblotting lysate. **(E)** 1205Lu cells from **(D)** were allowed to grow up to 72 hours. Viability by Trypan blue exclusion analysis was determined at 72 hours post transfection.

## Supplemental Figure S7

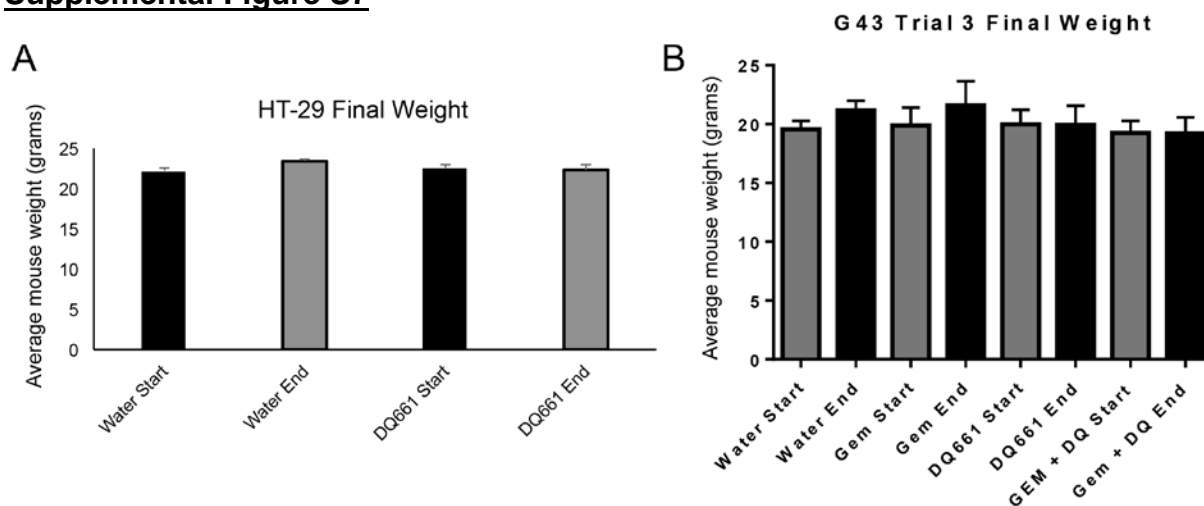

### Supplemental Figure S7 related to Figure 7:

(A) Average mouse weights at the end and start of treatment with water or DQ661 (4 mg/kg) in the colorectal model or (B) water, gemcitabine (one dose of 120 mg/kg), DQ661 (4 mg/kg) or the combination of gemcitabine (one dose of 120 mg/kg) plus DQ661 (4 mg/kg) in the pancreatic model.

| Compound | MW      | pKa    | CLogP   | tPSA  | nROTB | Linker Atoms |
|----------|---------|--------|---------|-------|-------|--------------|
| DQ 221   | 600.54  | 7.996  | 10.3455 | 70.48 | 10    | 7            |
| DQ 330   | 614.571 | 9.02   | 10.3715 | 79.27 | 12    | 9            |
| DQ 331   | 628.598 | 9.07   | 10.9955 | 70.48 | 12    | 9            |
| DQ 340   | 628.598 | 9.43   | 10.265  | 79.27 | 13    | 10           |
| DQ 341   | 642.625 | 9.383  | 10.8445 | 70.48 | 13    | 10           |
| DQ 440   | 642.625 | 9.74   | 10.1575 | 79.27 | 14    | 11           |
| DQ 441   | 656.652 | 9.693  | 10.6935 | 70.48 | 14    | 11           |
| DQ 550   | 670.679 | 10.009 | 11.2155 | 79.27 | 16    | 13           |
| DQ 551   | 684.706 | 9.963  | 11.7515 | 70.48 | 16    | 13           |
| DQ 660   | 698.733 | 10.229 | 12.2735 | 79.27 | 18    | 15           |
| DQ 661   | 712.76  | 10.182 | 12.8095 | 70.48 | 18    | 15           |
| DQ 770   | 726.787 | 10.241 | 13.3315 | 79.27 | 20    | 17           |
| DQ 771   | 740.814 | 10.195 | 13.8675 | 70.48 | 20    | 17           |
| DQ 880   | 754.841 | 10.293 | 14.3895 | 79.27 | 22    | 19           |
| DQ 881   | 768.868 | 10.246 | 14.9255 | 70.48 | 22    | 19           |
| DQ 11110 | 839.003 | 10.302 | 17.5635 | 79.27 | 28    | 25           |
| DQ 11111 | 853.03  | 10.256 | 18.0995 | 70.48 | 28    | 25           |

### Supplemental Table S1:

Physical properties were calculated using ChemBio Draw Ultra 2014 edition.
